# Supplementary material
Source: publisher site journal article supplement (https://www.dovepress.com/article/316560)
Supplement: Supplementary file 1 [file get_supplementary_file.php]

**Mesencephalic Astrocyte-derived Neurotrophic Factor Protects Against Post-operative Delirium via Inhibiting Inflammation and Microglia Activation in Cortex After Surgery**

**Mice behavior tests**

Multiple behavioral tests were performed on each mouse in the sequential order of buried food test, open field test and Y maze test at 24 hours before (baseline) the Anesthesia/Surgery, and at 24 hours after the Anesthesia/Surgery. The battery behavior tests were performed as described in the previous studies with modifications1,2.

**Buried food test (BFT)** Two days before the test, we gave each mouse 3 pieces of the sweetened cereal. On all test days, we habituated the mice for about one hour prior to the test by placing the home cage with mice in the behavior test room. We buried 1 sweetened cereal pellet 0.5 centimeter below the surface of bedding in order that it could not be viewed. We changed the location of the food pellet every time in a random fashion. Mouse was placed in the center of the test cage and the latency of the mouse to eat the food was measured. We defined the latency as from when the mouse was placed in the test cage until when the mouse uncovered the food pellet and grasped it in the forepaws and/or teeth. The observation time was 5 minutes. If the mouse could not find the pellet within 5 minutes, the testing session over and the latency was defined as 300 seconds for the mouse. We emptied the bedding from the test cage and cleaned the cage with 70% ethanol solution after each test.

**Open field test (OFT)** For OFT, the mouse was gently placed in the center of an open field chamber (40 × 40 × 40 centimeters) under dim light and allowed to move freely for 5 minutes. The movement parameters of the mouse were monitored and analyzed via a video camera connected to the Any-Maze animal tracking system software (Stoelting Co., Wood Dale, IL). The total distance moved (meters), the time (seconds) spent in the center of the open field, the freezing time (seconds) and the latency (the time in seconds for the mice to reach to the location at the first attempt) to the center of the open field were recorded and analyzed. We cleaned the floor of the open field with 70% ethanol solution between each test.

**Y maze test (YMT)** For YMT, the Y maze was placed in a quiet room. Each maze consisted of three arms (8 × 30 × 15 centimeters, width × length × height), with an angle of 120 degrees between each arm. The three arms included the start arm, in which the mouse starts to explore (always open); the novel arm (blocked at the first trial and opened at the second trial) and the other arm (always open). In the experiment, the start arm and other arm were designed randomly to avoid spatial memory error. The Y maze test consisted of 2 trials separated by an inter-trial interval (ITI). The first trial (training) was 10 minutes in duration, which allowed the mouse to explore 2 arms (the start arm and the other arm) of the maze, with the novel arm being blocked. After a 2 hours ITI, the second trial (retention) was conducted. For the second trial, the mouse was placed back in the maze in the same start arm. A video camera, which was linked to the Any-Maze animal tracking system software, was installed 60 centimeters above the chamber to monitor and analyze the number of entries and the time spent in each arm. The time spent in and entries into the novel arms indicated the spatial recognition memory (learned behavior). We cleaned each of the arms of the Y maze with 70% ethanol solution between trials.

**
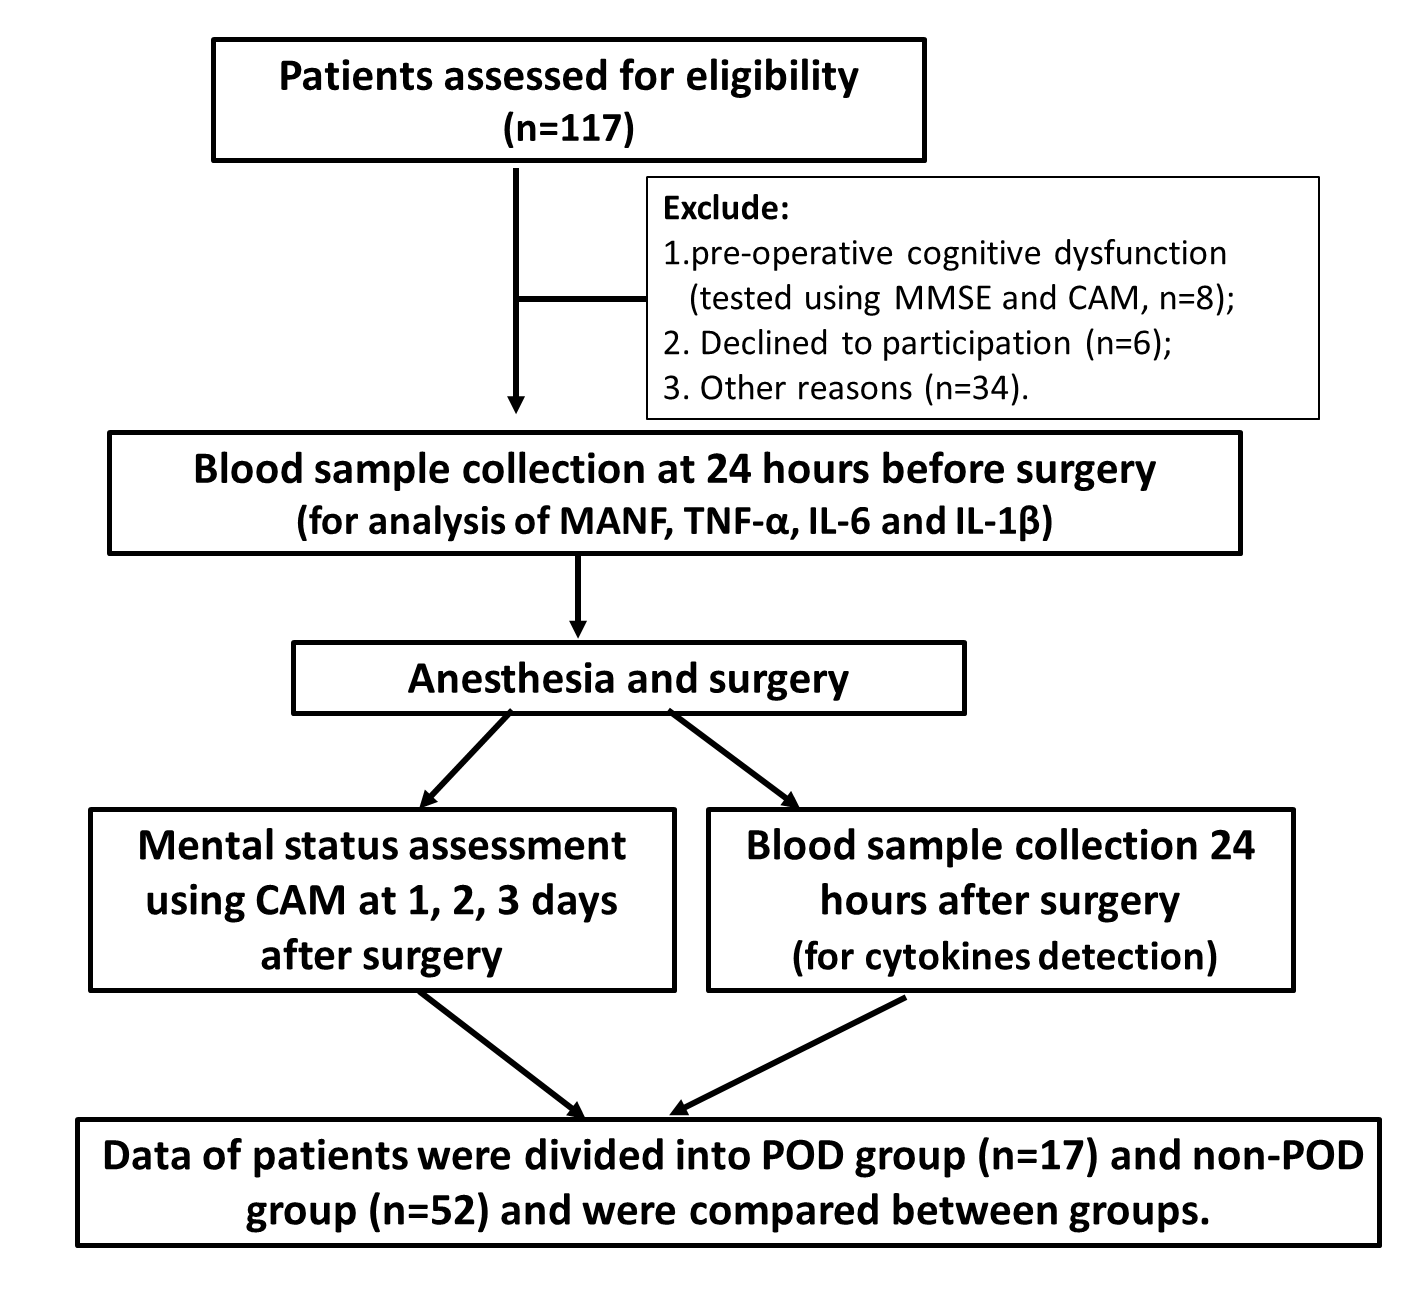
**

**Supplemented information Fig.1. The procedure of patient enrollments in POD observation and MANF detection.**

A total of 117 patients were assessed for eligibility, and 48 patients were excluded from the clinical experiment because of pre-operative cognitive dysfunction (n=8), declined to participation (n=6) and other reasons (n=34). Finally, 69 patients were eligible to be involved in the clinical experiment. After anesthesia and surgery, mental status assessment was performed among 69 involved patients to distinguish POD and non-POD patients. 17 and 52 patients were diagnosed as POD (n=17) and non-POD (n=52) respectively. Also, for both POD and non-POD patients, blood samples were collected at 24 hours before and after surgery respectively.

**
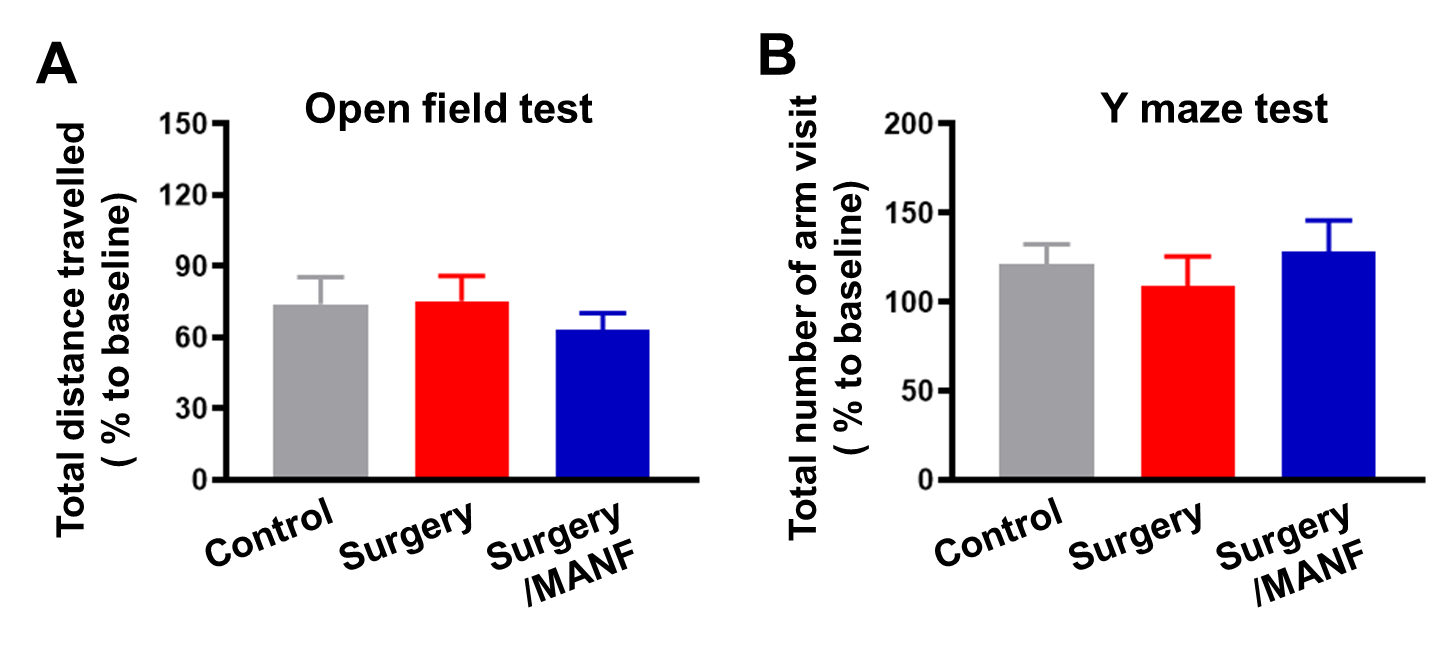
**

**Supplemental information Fig.2 Effect of MANF on some behaviors of mice in open field test and Y maze test**

The total distance travelled by mice in open field (A) test and the total number of arm visit by mice in Y maze test (B) were used to evaluate mice motor ability.

1. Peng M, Zhang C, Dong Y, et al. Battery of behavioral tests in mice to study postoperative delirium. *Sci Rep.* 2016;6:29874.

2. Lu Y, Chen L, Ye J, et al. Surgery/Anesthesia disturbs mitochondrial fission/fusion dynamics in the brain of aged mice with postoperative delirium. *Aging (Albany NY).* 2020;12(1):844-865.
